# Supplementary material for: Salivary IgA and vimentin differentiate in vitro SARS-CoV-2 infection: A study of 290 convalescent COVID-19 patients
Source: PubMed Central journal article supplement (PMC11139657; doi:10.1016/j.mucimm.2023.11.007), 2024-02
Supplement: mmc1.pdf [file mmc1.pdf]

# Supplementary Figure 1

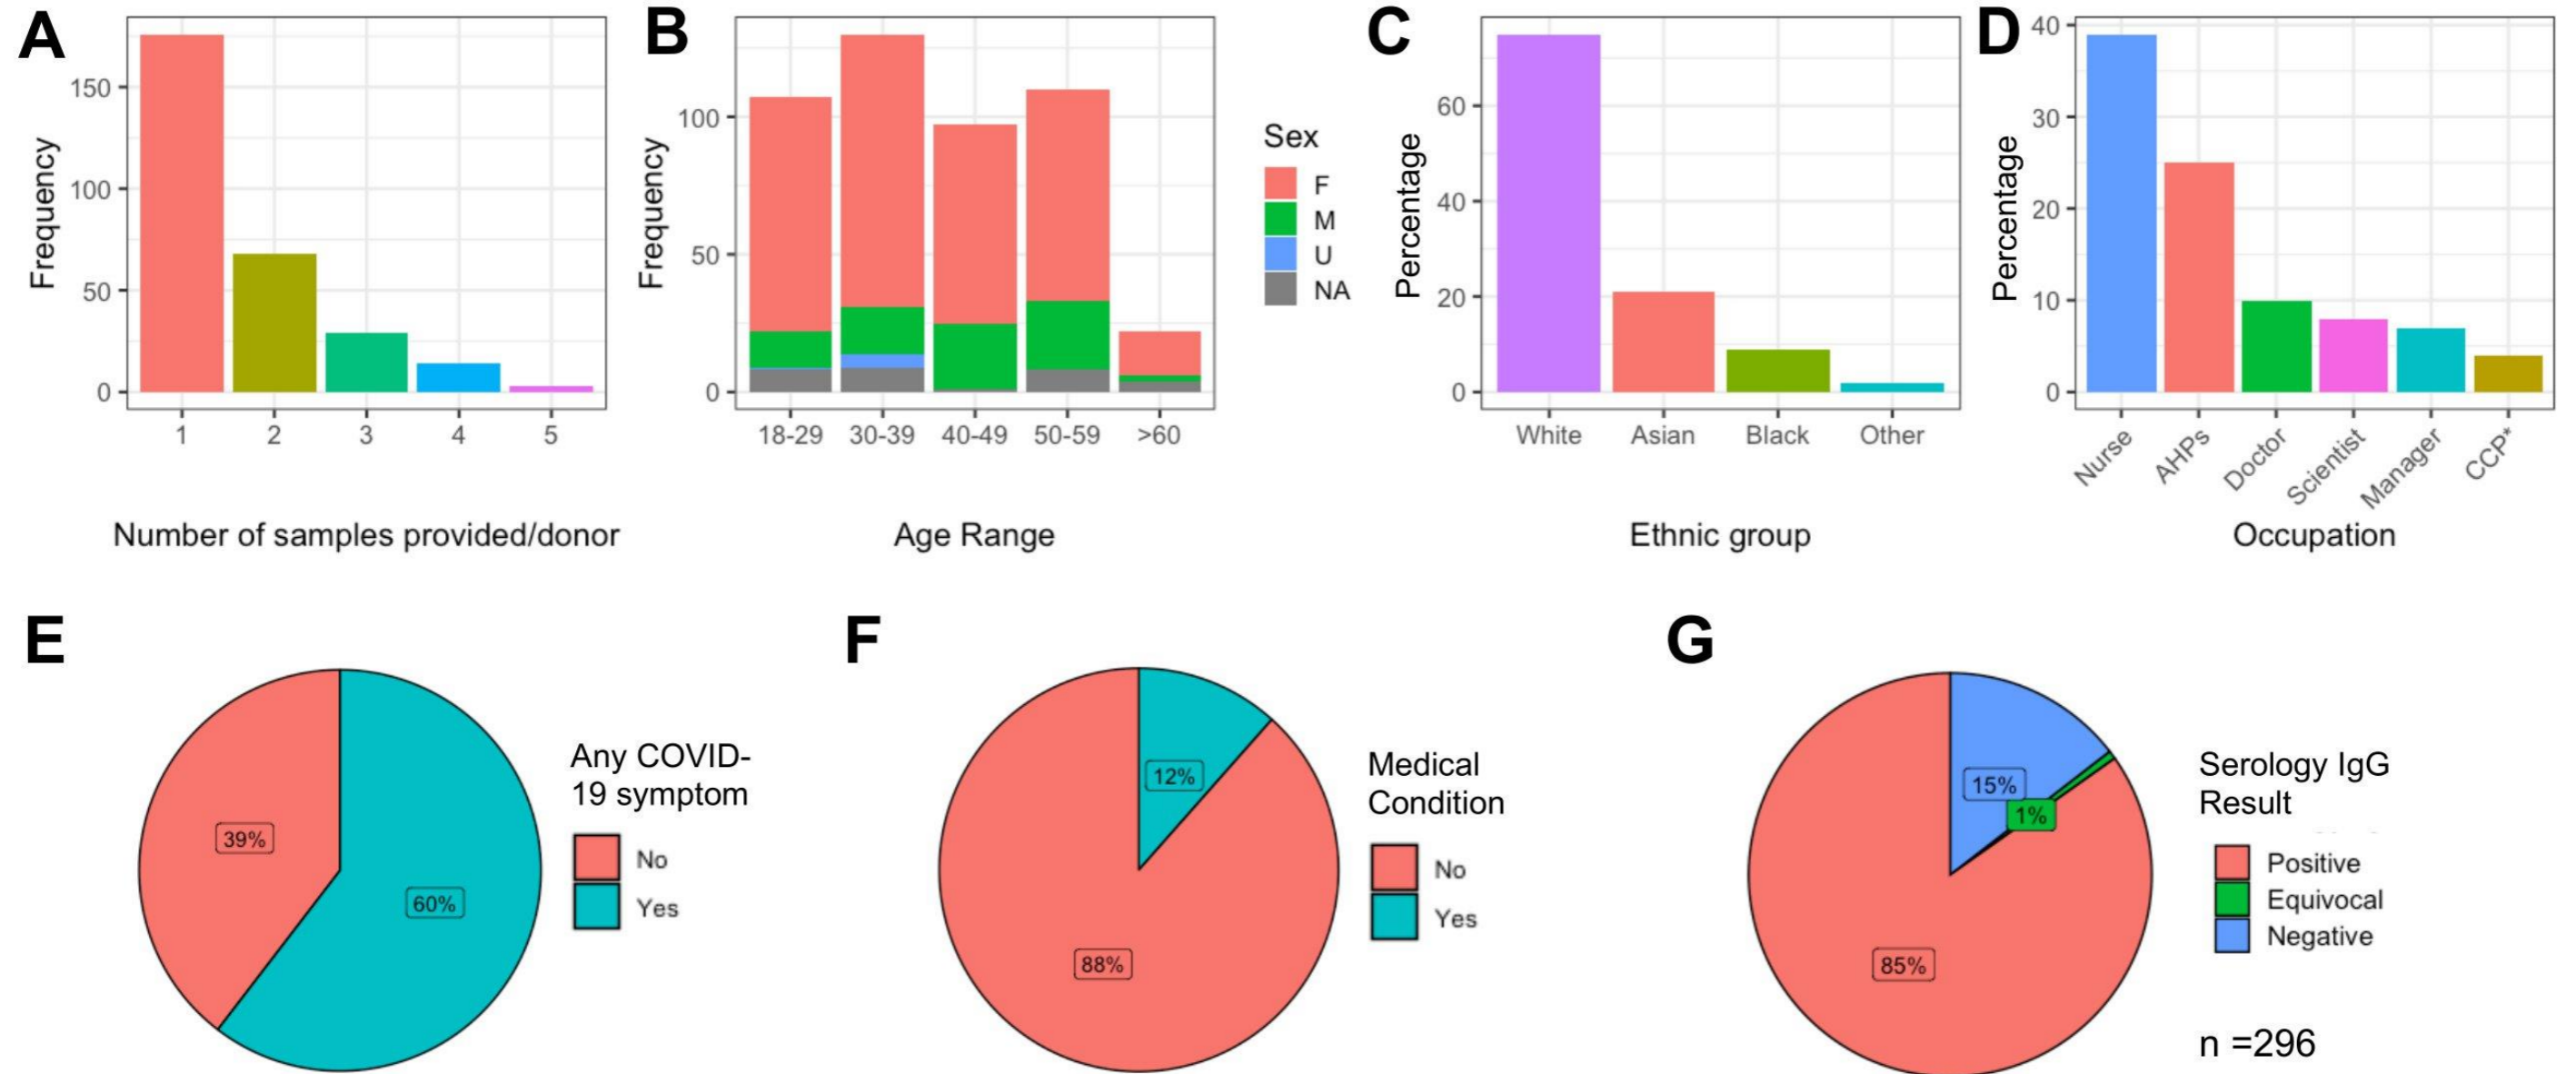

**Supplementary Figure 1. Demographics of study population. A)** Number of longitudinal saliva samples provided by study participants (n = 290). **B)** Number of study participants in different age groups and gender (n=270), including gender undeclared (U) and not available (NA). **C)** Number of study participants within different ethnic groups (n= 290). Here, over 75% of participants are classified as white. **D)** Number of participants within each NHS occupational category. Almost 70% of workers in this study were nurses or allied health professionals (AHPs) (n=242) \*CCP = Cleaning, catering, or porters. **E)** Percentage of participants who reported having symptoms of COVID-19 prior to enrolment at positive PCR and/or serological test (n=290). **F)** Percentage of participants with underlying health issues outside the exclusion criteria (n=290). **G)** Percentage of participants who tested positive for anti-SARS-CoV-2 IgG in serology arm of Co-Stars study (n=296).

## Supplementary Figure 2

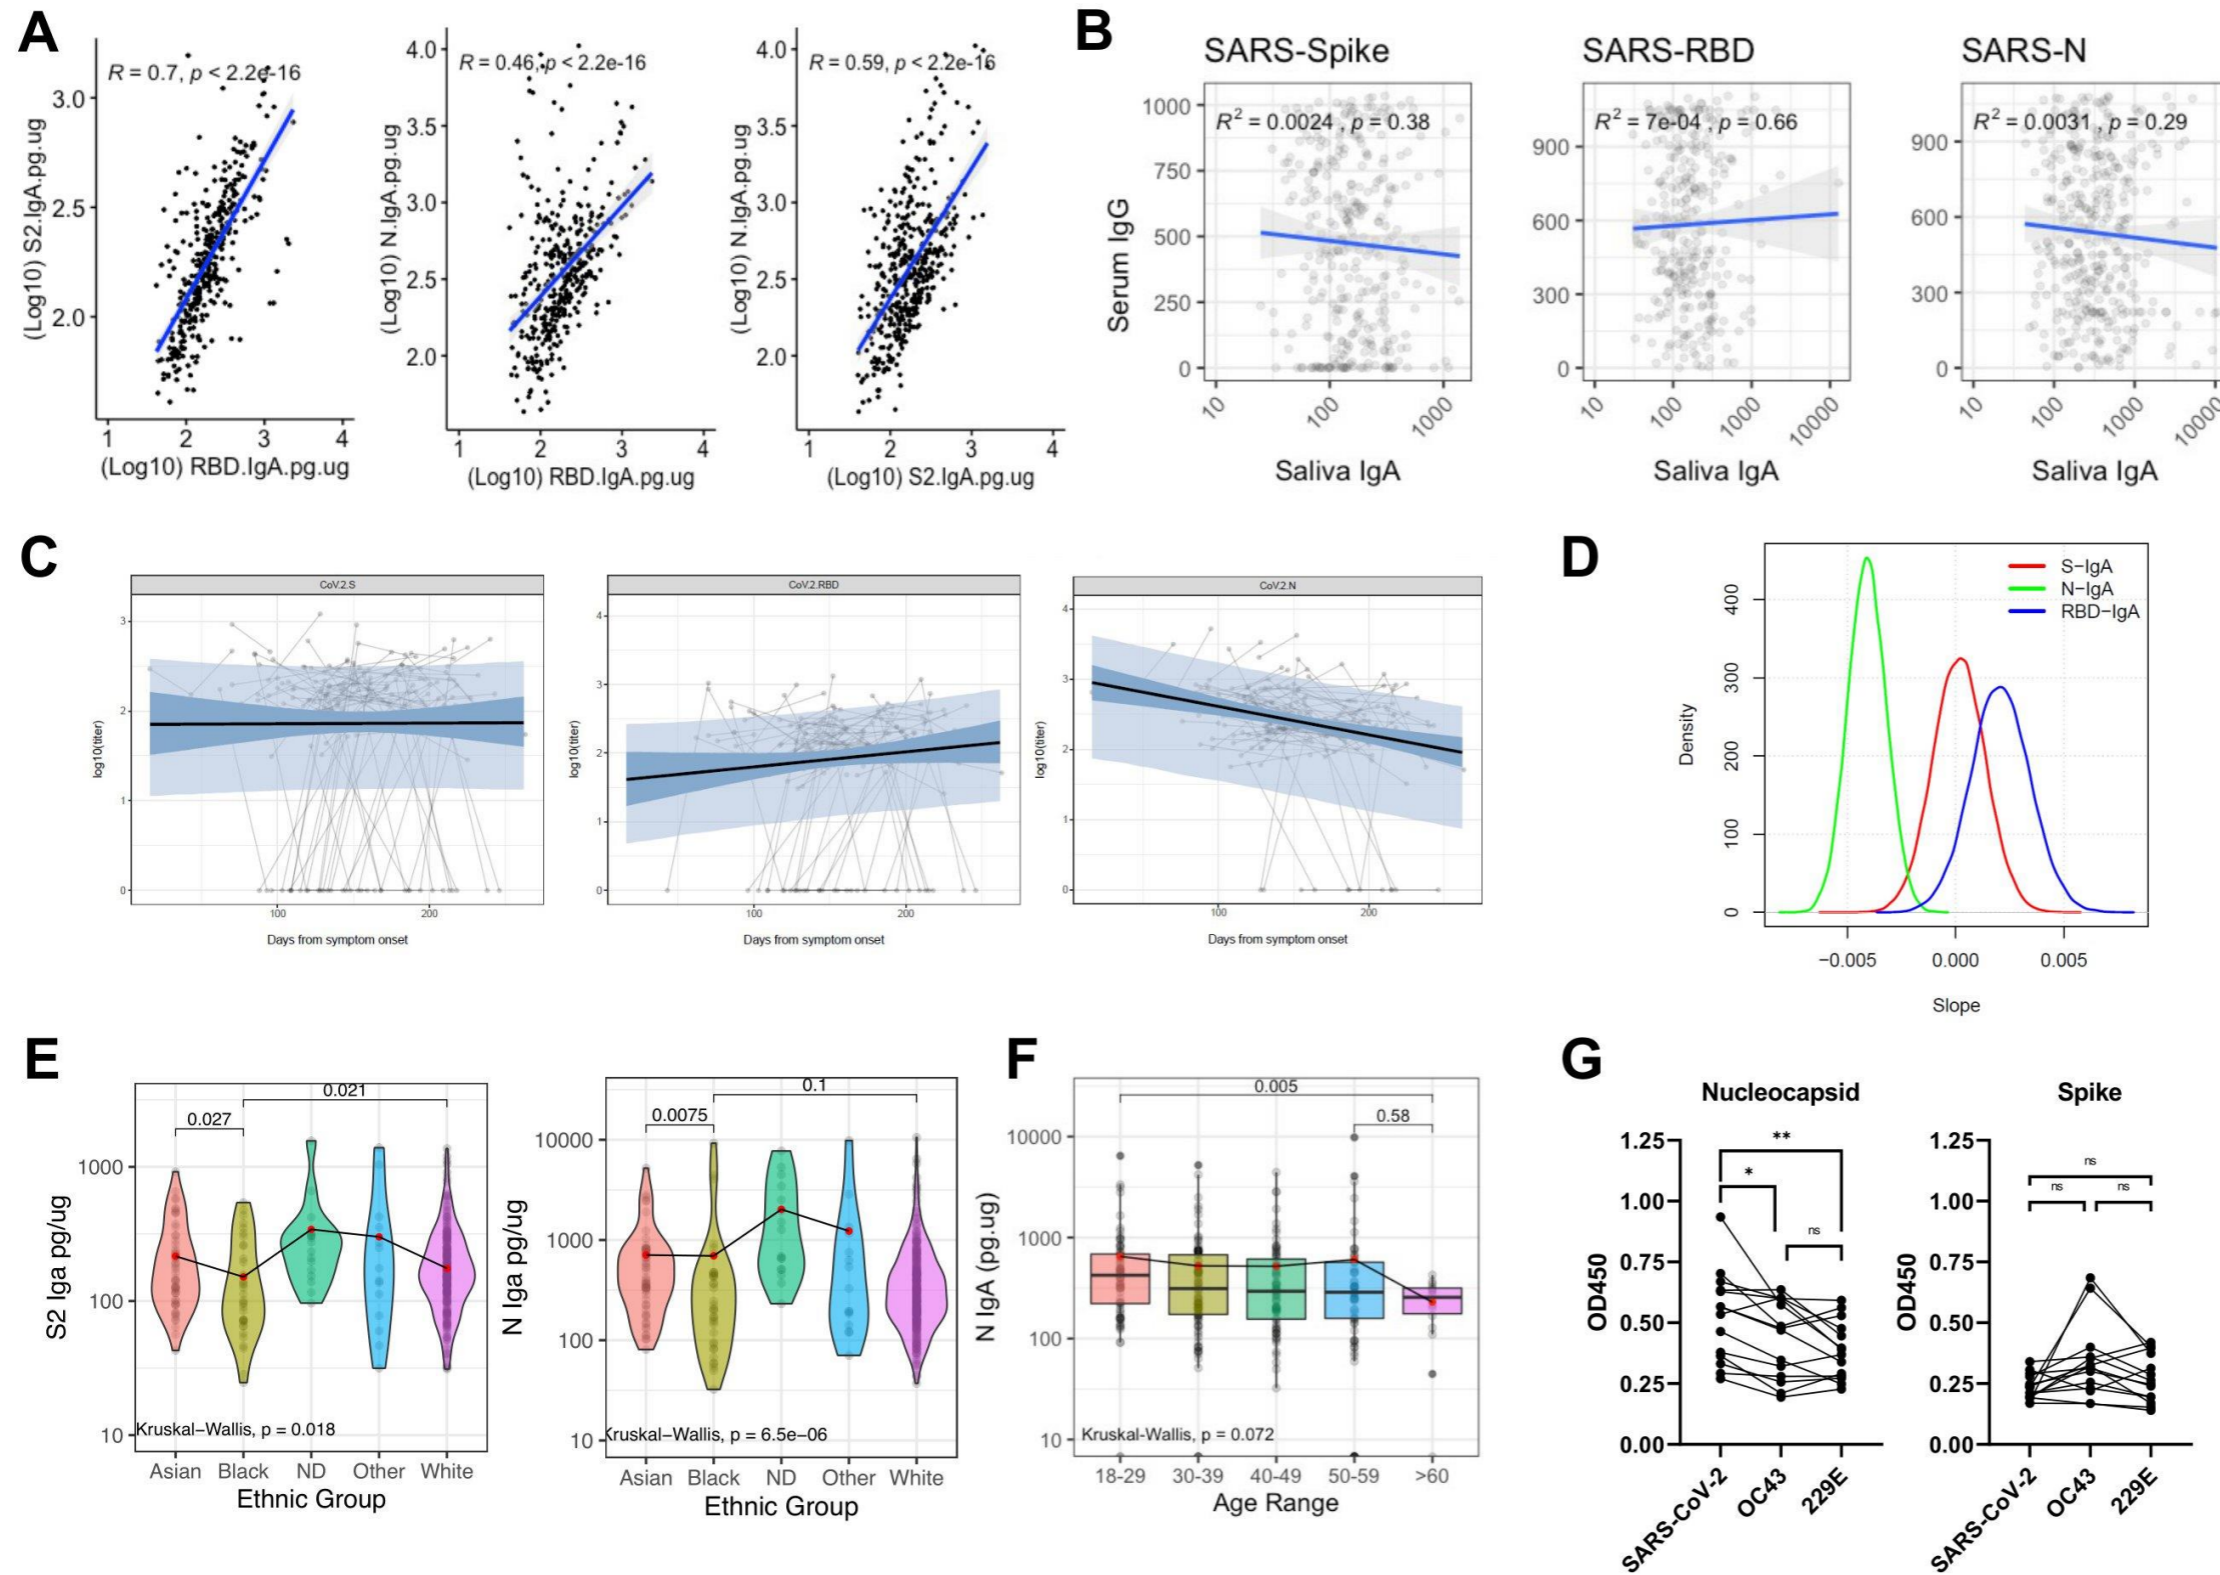

**Supplementary Figure 2. Analysis of antibody correlations and persistence in convalescent health care workers** **A)** A linear model fit was used to show the relationship between anti-S, anti-RBD and anti-N IgA concentrations, normalised to total protein (pg/ $\mu$ g). The value of  $r$  denotes the value of the Pearson's coefficient and  $p$ -value of significance is given. ( $n=488$ ) **B)** A linear model fit was used to show the relationship between saliva IgA and serology IgG for each SARS-CoV-2 antigen. **C)** Longitudinal IgA data from participants who provided repeated samples over time, which was used to calculate IgA decay rate using a constant exponential decay model. **D)** The IgA decay rate (slope represents change of  $\log_{10}$  IgA titer per day) for each antigen as predicted by a constant exponential decay model. **E)** Anti-S and anti-N IgA by participant ethnicity, with red dots representing the mean for each group. **F)** Anti-N IgA was analysed by donor age group. Solid black bars denote the median and the red dot represents the mean for each age cohort. Kruskal-Wallis test was used to calculate significance overall and for specific groups using R. **G)** Salivary IgA recognition of N and S antigen from SARS-CoV-2 and seasonal coronaviruses OC43 and 229E ( $n=14$ ).

# Supplementary Figure 3

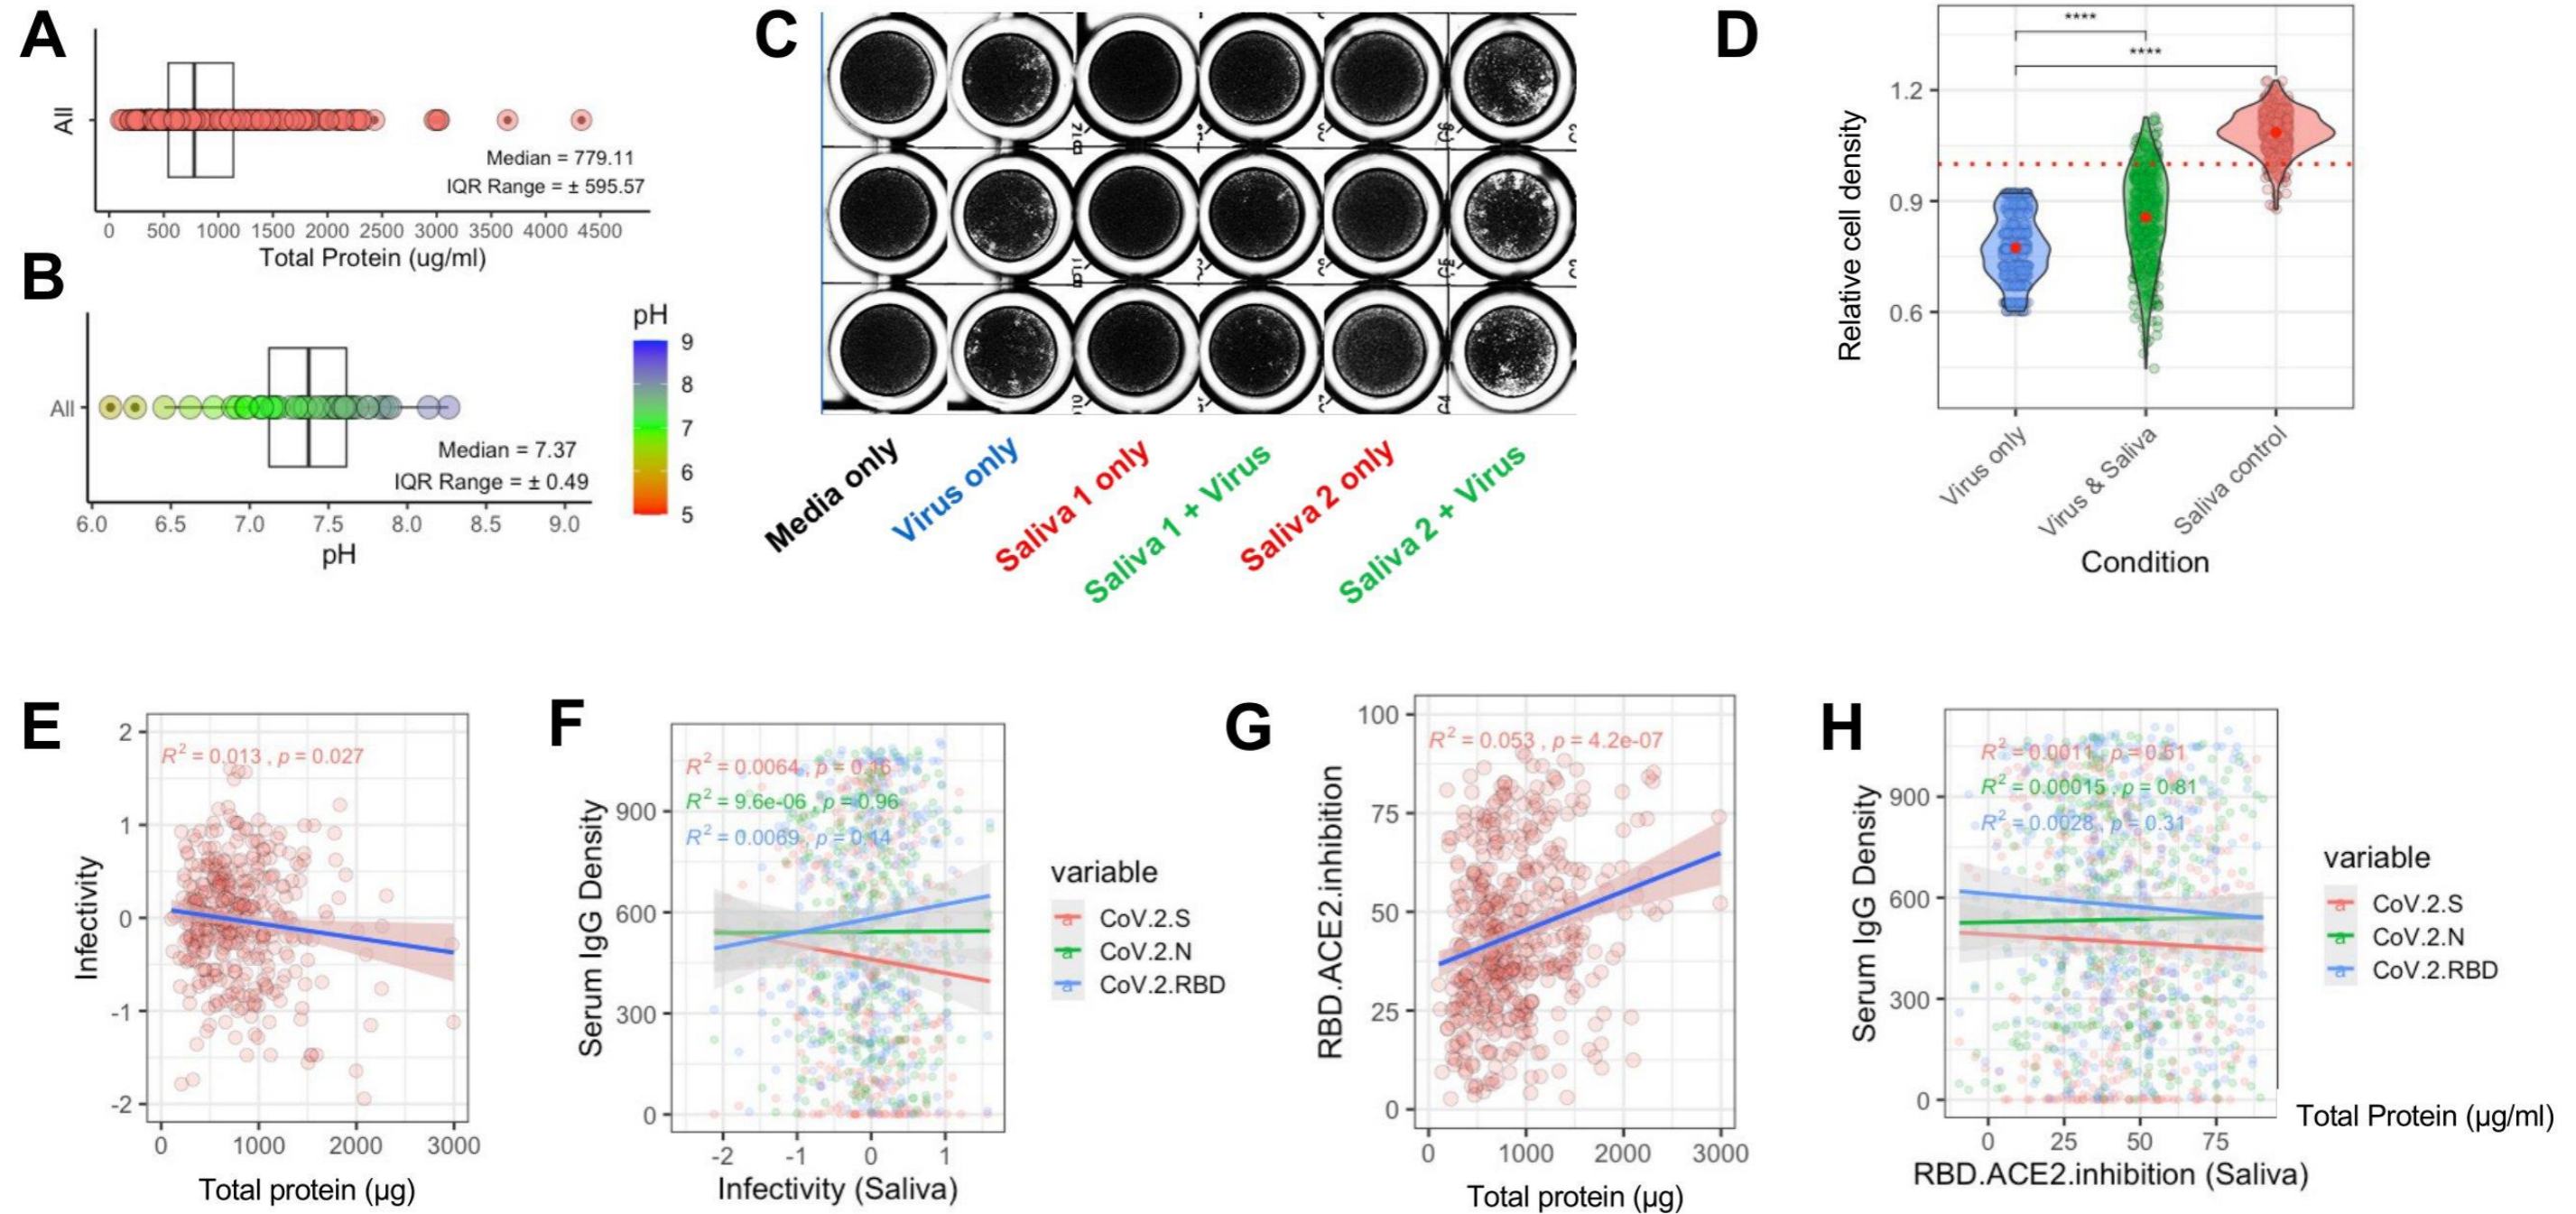

**Supplementary Figure 3. Functional analysis of saliva from convalescent health care workers.** **A)** The total protein concentration of all saliva samples (n = 488). **B)** The pH of a subset of the collected saliva samples (n=48). **C)** Assay design and representative images of the in vitro SARS-CoV-2 infectivity assay using VeroE6 epithelial cells stained with crystal violet. Sample 1 demonstrates reduction of relative infection and Sample 2 is representative of enhancement of infectivity. **D)** The endpoint VeroE6 cell density, expressed as a ratio versus untreated negative control (red line at ratio 1.0). Red dot denotes the median for each treatment. Kruskal-Wallis test was used to calculate significance overall and for specific groups using R (n=395). **E)** A linear model fit was used to show the relationship between relative infection of VeroE6 cells (fold-change versus virus-only controls) and total protein concentrations (n=395). The value of  $r$  = denotes the value of the Pearson's coefficient and p-value of significance is given. **F)** A linear model fit was used to show the relationship between the effect of saliva sample on VeroE6 cell infectivity and the matched serum IgG levels against SARS-CoV-2 antigens. **G)** A linear model fit was used to show the relationship between inhibition of RBD-ACE2 binding (%) and total protein concentrations (n=488). **H)** A linear model fit was used to show the relationship between the inhibition of RBD-ACE2 binding (%) by saliva and the matched serum IgG levels against SARS-CoV-2 antigens.

## Supplementary Figure 4

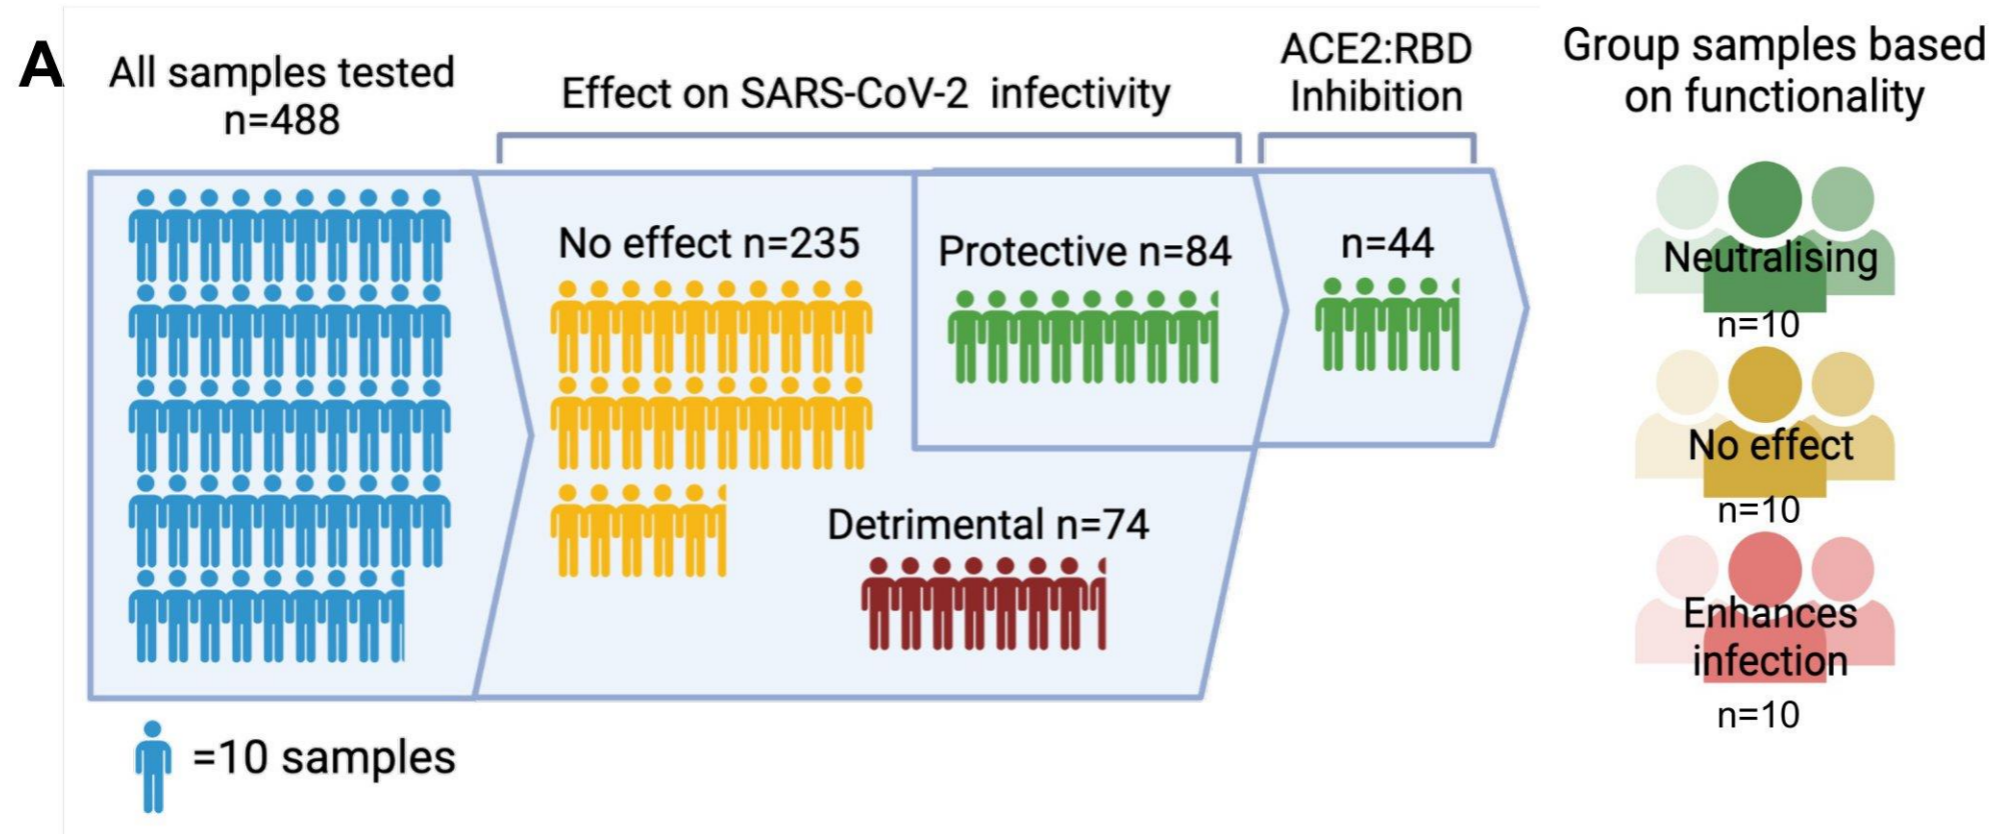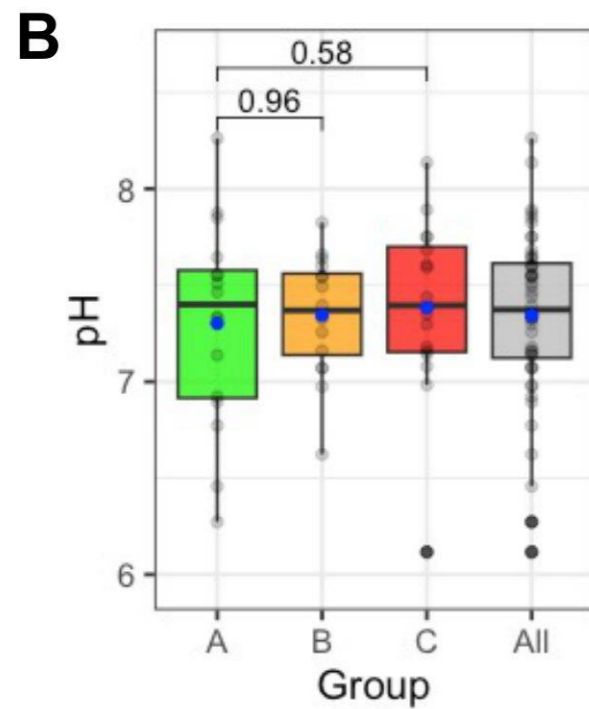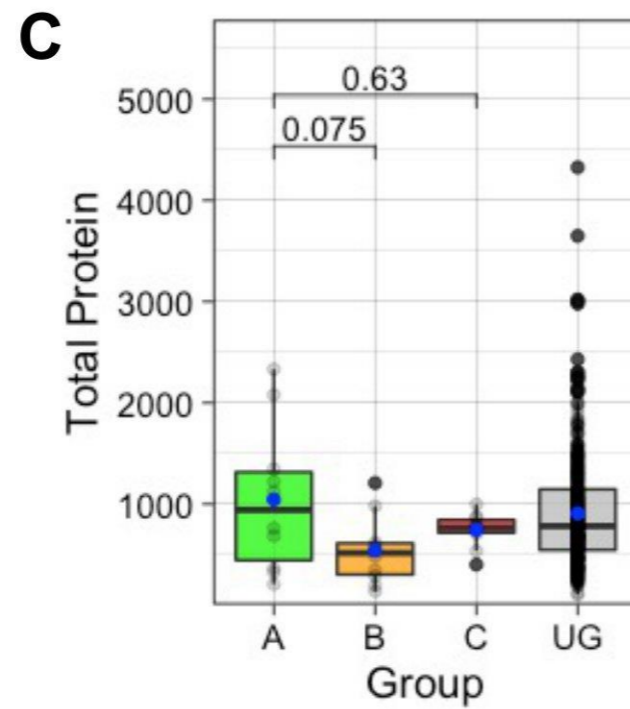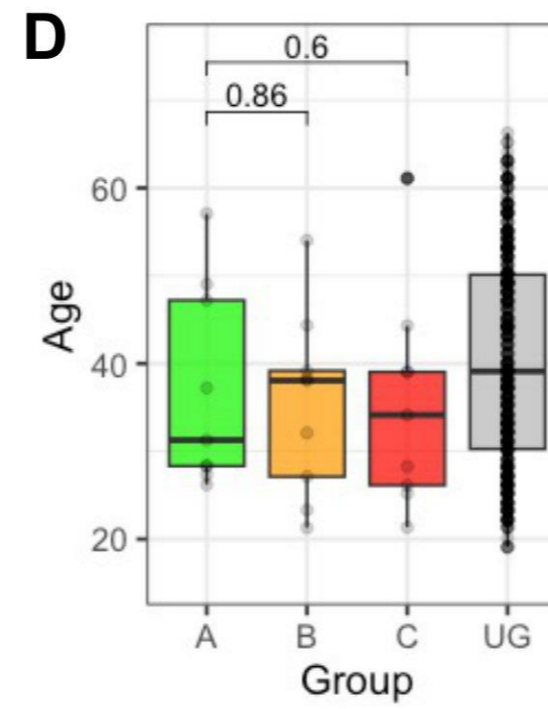

**Supplementary Figure 4. Functional comparisons of saliva subsets selected for proteomics. A)** A graphical representation of sample collection broken down by function. Protective effect on infectivity here represents  $FC > +0.5$ , detrimental effect represents  $FC < -0.5$ . ACE2-RBD inhibition represents  $>50\%$  relative inhibition. **B)** Distribution of pH compared between subgroups A-C (n=10 each) and all pH screened samples (n=48). **C)** Distribution of total protein concentration ( $\mu\text{g/ml}$ ) compared between subgroups A-C (n=10 each) and ungrouped (UG) samples (n=458). **D)** Distribution of donor age compared between subgroups A-C (n=10 each) and ungrouped (UG) samples (n=458). Black lines indicate median for each group, blue dot indicates mean value.

# Supplementary Figure 5

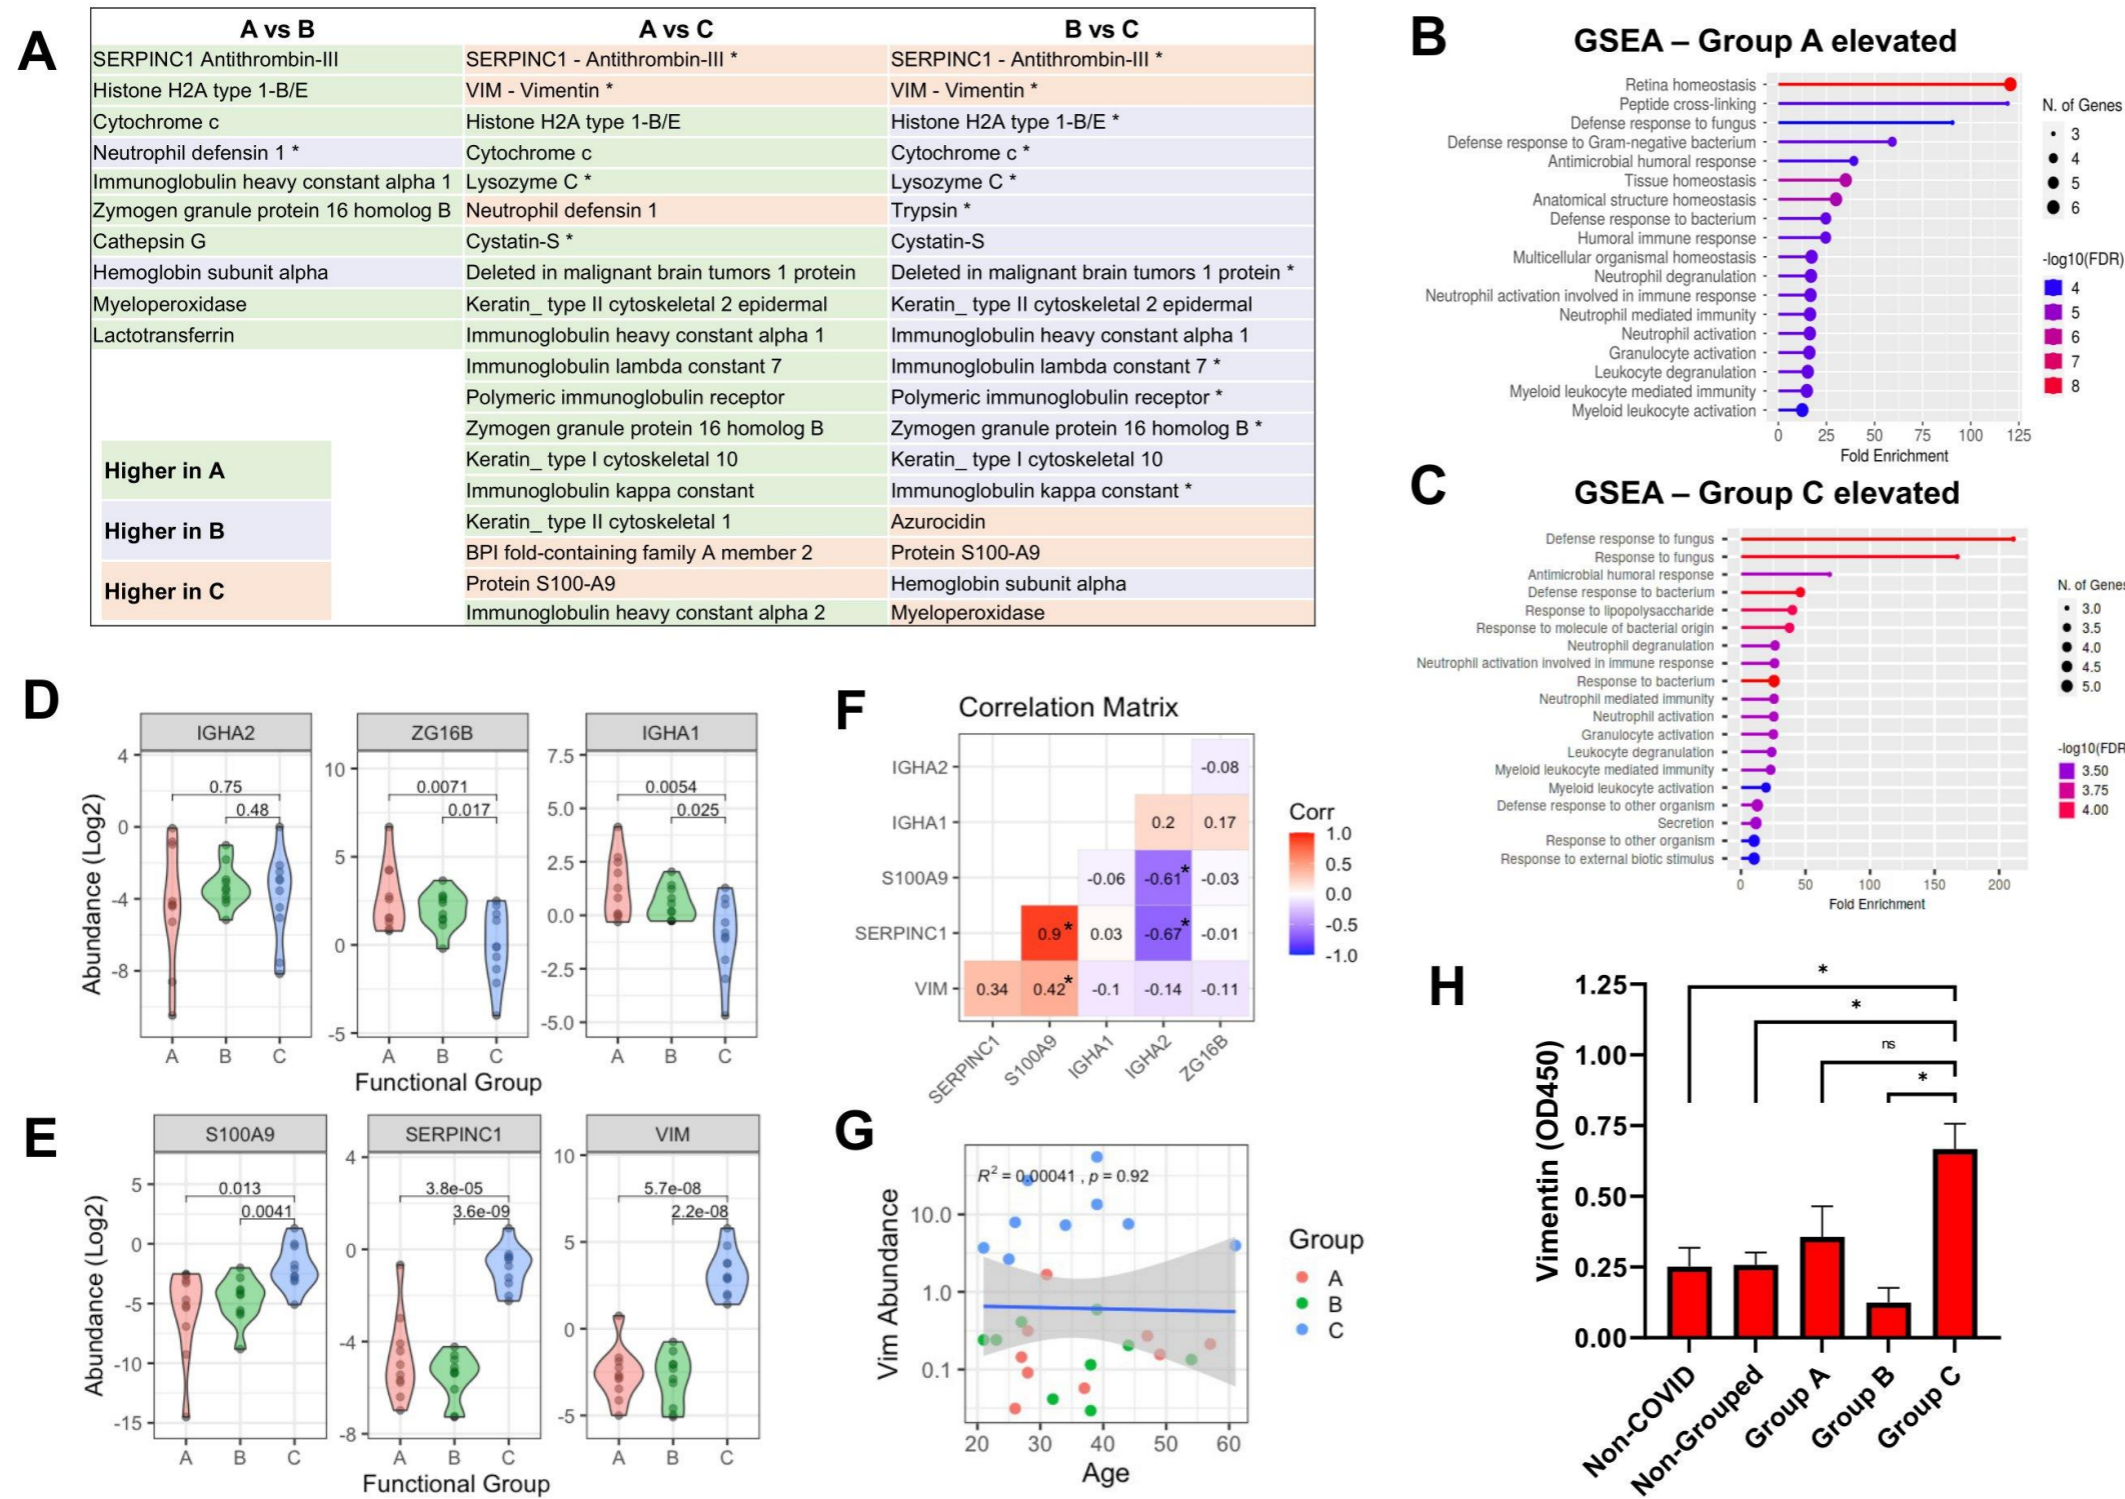

**Supplementary Figure 5. Protein analysis of saliva functional subgroups. A)** A summary of spike-binding proteins significantly elevated in group A, B or C. Proteins may be significantly elevated in group A (green), group B (blue) or group C (orange). **B)** GSEA pathway analysis for the proteins most highly expressed in Group A. **C)** GSEA Pathway analysis for the proteins most highly expressed in Group C. **D)** Violin plot showing the abundance of most differentially expressed spike-binding proteins detected in Group A (neutralising). **E)** Violin plot showing the abundance of most differentially expressed spike-binding proteins detected in Group C (detrimental). **F)** Correlation matrix showing the associations of vimentin (VIM), S100 calcium binding protein A9 (S100A9), antithrombin III (SERPINC1), Immunoglobulin heavy constant alpha chains (IGHA1 and IGHA2) and Zymogen Granule Protein 16B (ZG16B), as determined using the cor function of ggcorrplot package using R version 2023.03.1+446. (n=30; \* represents significant correlation  $p < 0.05$ ) **G)** A linear model fit was used to show the relationship between vimentin abundance and donor ages, with the functional groups indicated by colour (n=27). **H)** Mean vimentin protein abundance quantified by ELISA, comparing representative samples from subgroups A-C with non-grouped saliva samples and saliva samples from non-COVID volunteer donors (n=31).

# Supplementary Tables

Supplementary Table 1: Demographics and self-reported symptoms of study population

| Age Groups   | Count<br>n    | Gender         |               |              | BAME          |                | Any symptom |                | Any COVID-19 symptom |                | Abnormal Smell |                | Abnormal Taste |                | Cough          |                | Fever          |                |                |
|--------------|---------------|----------------|---------------|--------------|---------------|----------------|-------------|----------------|----------------------|----------------|----------------|----------------|----------------|----------------|----------------|----------------|----------------|----------------|----------------|
|              |               | F              | M             | ND           | Y             | N              | ND          | Y              | N                    | Y              | N              | Y              | N              | Y              | N              | Y              | N              |                |                |
| 18-29        | 79<br>(27.2%) | 59<br>(74.7%)  | 13<br>(16.5%) | 7<br>(8.9%)  | 13<br>(16.5%) | 64<br>(81.0%)  | 2<br>(2.5%) | 69<br>(87.3%)  | 10<br>(12.7%)        | 54<br>(68.4%)  | 25<br>(31.6%)  | 37<br>(46.8%)  | 42<br>(53.2%)  | 36<br>(45.6%)  | 43<br>(54.4%)  | 35<br>(44.3%)  | 44<br>(55.7%)  | 31<br>(39.2%)  | 48<br>(60.8%)  |
| 30-39        | 89<br>(30.7%) | 70<br>(78.7%)  | 11<br>(12.4%) | 8<br>(9.0%)  | 26<br>(29.2%) | 62<br>(69.7%)  | 1<br>(1.1%) | 71<br>(79.8%)  | 18<br>(20.2%)        | 52<br>(58.4%)  | 37<br>(41.6%)  | 40<br>(44.9%)  | 49<br>(55.1%)  | 41<br>(46.1%)  | 48<br>(53.9%)  | 42<br>(47.2%)  | 47<br>(52.8%)  | 30<br>(33.7%)  | 59<br>(66.3%)  |
| 40-49        | 60<br>(20.7%) | 44<br>(73.3%)  | 15<br>(25.0%) | 1<br>(1.7%)  | 21<br>(35.0%) | 39<br>(65.0%)  | 0<br>(0.0%) | 46<br>(76.7%)  | 14<br>(23.3%)        | 33<br>(55.0%)  | 27<br>(45.0%)  | 23<br>(38.3%)  | 37<br>(61.7%)  | 23<br>(38.3%)  | 37<br>(61.7%)  | 28<br>(46.7%)  | 32<br>(53.3%)  | 19<br>(31.7%)  | 41<br>(68.3%)  |
| 50-59        | 49<br>(16.9%) | 35<br>(71.4%)  | 10<br>(20.4%) | 4<br>(8.2%)  | 13<br>(26.5%) | 35<br>(71.4%)  | 1<br>(2.0%) | 40<br>(81.6%)  | 9<br>(18.4%)         | 30<br>(61.2%)  | 19<br>(38.8%)  | 25<br>(51.0%)  | 24<br>(49.0%)  | 28<br>(57.1%)  | 21<br>(42.9%)  | 22<br>(44.9%)  | 27<br>(55.1%)  | 23<br>(46.9%)  | 26<br>(53.1%)  |
| 60<          | 13<br>(4.5%)  | 10<br>(76.9%)  | 2<br>(15.4%)  | 1<br>(7.7%)  | 2<br>(15.4%)  | 11<br>(84.6%)  | 0<br>(0.0%) | 11<br>(84.6%)  | 2<br>(15.4%)         | 7<br>(53.8%)   | 6<br>(46.2%)   | 3<br>(23.1%)   | 10<br>(76.9%)  | 4<br>(30.8%)   | 9<br>(69.2%)   | 8<br>(61.5%)   | 5<br>(38.5%)   | 5<br>(38.5%)   | 8<br>(61.5%)   |
| <b>Total</b> | 290           | 218<br>(75.2%) | 51<br>(17.6%) | 21<br>(7.2%) | 75<br>(25.9%) | 211<br>(72.8%) | 4<br>(1.4%) | 237<br>(81.7%) | 53<br>(18.3%)        | 176<br>(60.7%) | 114<br>(39.3%) | 128<br>(44.1%) | 162<br>(55.9%) | 132<br>(45.5%) | 158<br>(54.5%) | 135<br>(46.6%) | 155<br>(53.4%) | 108<br>(37.2%) | 182<br>(62.8%) |

**Supplementary Table 2: Longitudinal sample summary**

| <b>Clinic visit number</b> | <b>Number of samples</b> | <b>Weeks post first sample<br/>(median± IQR)</b> | <b>Week interval<br/>(median± IQR)</b> |
|----------------------------|--------------------------|--------------------------------------------------|----------------------------------------|
| 1                          | 290                      | -                                                | -                                      |
| 2                          | 113                      | 5.6 (± 0.3)                                      | 5.6 (± 0.3)                            |
| 3                          | 45                       | 9.8 (± 0.4)                                      | 4.9 (± 0.3)                            |
| 4                          | 17                       | 13.4 (± 0.5)                                     | 4.1 (± 0.2)                            |
| 5                          | 3                        | 14.7 (± 0.3)                                     | 3.3 (± 0.3)                            |

**Supplementary Table 3: Demographics and functionality of grouped saliva samples**

| Group | Person ID | Collection Week | Sex | Age |       | Abnormal Smell | Abnormal Taste | Hospital Admitted | Attended Hospital | Cough | Fever | Symptomatic | Asthma | BAME | Ethnic group | Height (cm) | Weight (kg) | BMI  | Occupation | Serum IgG (MSD) |         |           | Total Protein (µg/ml) | RBD.ACE2 inhibition % | VeroE6 assay    |                                  |
|-------|-----------|-----------------|-----|-----|-------|----------------|----------------|-------------------|-------------------|-------|-------|-------------|--------|------|--------------|-------------|-------------|------|------------|-----------------|---------|-----------|-----------------------|-----------------------|-----------------|----------------------------------|
|       |           |                 |     | Age | group |                |                |                   |                   |       |       |             |        |      |              |             |             |      |            | CoV.2.S         | CoV.2.N | CoV.2.RBD |                       |                       | Saliva Toxicity | SARS-CoV-2 Infectivity (Log2 FC) |
| A     | 33958     | 28              | F   | 57  | 50-59 | Yes            | Yes            | No                | No                | Yes   | Yes   | Yes         | No     | Yes  | Black        | 157         | 86          | 34.9 | Porter     | 505             | 1074    | 546       | 2332.65               | 49.45                 | 1.09            | -6.64                            |
| A     | -         | 30              | -   | -   | -     | -              | -              | -                 | -                 | -     | -     | -           | -      | -    | -            | -           | -           | -    | -          | -               | -       | -         | 1120.71               | 46.48                 | 1.10            | -1.47                            |
| A     | 30655     | 30              | F   | 28  | 18-29 | No             | No             | No                | No                | Yes   | No    | Yes         | No     | No   | White        | 175         | 71          | 23.2 | Nurse      | 542             | 575     | 614       | 1222.44               | 32.66                 | 1.13            | -4.32                            |
| A     | 32645     | 30              | F   | 47  | 40-49 | No             | No             | No                | No                | No    | No    | No          | No     | No   | White        | 163         | 80          | 30.1 | -          | 643             | 480     | 547       | 2079.38               | 23.28                 | 1.08            | -1.94                            |
| A     | 29047     | 31              | M   | 37  | 30-39 | No             | No             | No                | No                | No    | No    | No          | No     | Yes  | Asian        | 171         | 91.9        | 31.6 | Manager    | 1               | 222     | 312       | 1347.14               | 62.46                 | 1.04            | -2.12                            |
| A     | 31229     | 34              | F   | 28  | 18-29 | No             | No             | No                | No                | No    | No    | No          | No     | No   | White        | No          | No          | -    | Nurse      | 25              | 371     | 186       | 208.46                | 68.67                 | 1.07            | -1.79                            |
| A     | 30987     | 34              | F   | 49  | 50-59 | No             | No             | No                | No                | Yes   | No    | Yes         | No     | No   | White        | No          | No          | -    | Nurse      | 682             | 833     | 1008      | 326.59                | 22.96                 | 1.17            | -1.74                            |
| A     | 35784     | 34              | F   | 31  | 30-39 | Yes            | No             | No                | No                | Yes   | No    | Yes         | No     | No   | White        | No          | No          | -    | AHPs       | 699             | 491     | 353       | 365.01                | 73.18                 | 1.10            | -1.36                            |
| A     | 31083     | 34              | F   | 27  | 18-29 | Yes            | Yes            | No                | No                | No    | No    | Yes         | No     | Yes  | Black        | No          | No          | -    | -          | 48              | 275     | 132       | 762.08                | 29.38                 | 1.10            | -1.29                            |
| A     | 32771     | 40              | -   | 26  | 18-29 | Yes            | Yes            | No                | No                | No    | Yes   | Yes         | No     | No   | White        | No          | No          | -    | Nurse      | -               | -       | -         | 686.77                | 31.48                 | 0.93            | -4.06                            |
| B     | -         | 30              | -   | -   | -     | -              | -              | -                 | -                 | -     | -     | -           | -      | -    | -            | -           | -           | -    | -          | -               | -       | -         | 1208.37               | 54.89                 | 1.10            | 0.03                             |
| B     | 31307     | 30              | F   | 39  | 40-49 | No             | No             | No                | No                | Yes   | Yes   | Yes         | No     | Yes  | Other        | No          | No          | -    | Nurse      | 1               | 828     | 483       | 346.78                | 41.71                 | 1.08            | 0.01                             |
| B     | 29591     | 31              | F   | 32  | 30-39 | Yes            | Yes            | No                | No                | Yes   | Yes   | Yes         | No     | No   | White        | 158         | 57          | 22.8 | Doctor     | 656             | 521     | 226       | 289.3                 | 15.93                 | 1.18            | 0.03                             |
| B     | 38674     | 34              | F   | 38  | 30-39 | Yes            | Yes            | No                | No                | Yes   | No    | Yes         | No     | No   | White        | No          | No          | -    | Nurse      | 953             | 400     | 898       | 981.25                | 24.03                 | 1.10            | 0.03                             |
| B     | 31288     | 34              | F   | 21  | 18-29 | Yes            | Yes            | No                | No                | Yes   | No    | Yes         | No     | No   | White        | No          | No          | -    | Nurse      | 297             | 168     | 237       | 138.73                | 9.41                  | 1.15            | 0.01                             |
| B     | 37317     | 36              | F   | 23  | 18-29 | No             | No             | No                | No                | No    | No    | Yes         | No     | Yes  | Black        | No          | No          | -    | Nurse      | 975             | 273     | 4         | 621.69                | 20.45                 | 1.05            | 0.06                             |
| B     | 31173     | 37              | F   | 54  | 50-59 | Yes            | Yes            | No                | No                | No    | Yes   | Yes         | No     | No   | White        | No          | No          | -    | AHPs       | 413             | 353     | 852       | 484.91                | 23.32                 | 1.06            | 0.06                             |
| B     | 30280     | 38              | F   | 44  | 40-49 | No             | No             | No                | No                | No    | No    | No          | No     | No   | White        | 166         | 58          | 21.0 | Nurse      | 100             | 422     | 297       | 548.97                | 15.97                 | 1.08            | 0.06                             |
| B     | 32693     | 38              | F   | 27  | 18-29 | Yes            | Yes            | No                | No                | No    | No    | Yes         | No     | No   | White        | No          | No          | -    | Nurse      | 246             | 462     | 213       | 586.88                | 50.91                 | 1.02            | 0.00                             |
| B     | 29199     | 43              | F   | 38  | 30-39 | Yes            | Yes            | No                | Yes               | Yes   | No    | Yes         | No     | Yes  | Asian        | 163         | 70          | 26.3 | -          | -               | -       | 195.06    | 20.47                 | 1.15                  | 0.07            |                                  |
| C     | 29942*    | 28              | F   | 39  | 40-49 | No             | No             | No                | No                | Yes   | Yes   | Yes         | No     | No   | White        | 164         | 72          | 26.8 | Manager    | 319             | 398     | 325       | 997.71                | 42.57                 | 1.08            | 1.05                             |
| C     | 31339     | 29              | M   | 28  | 18-29 | No             | No             | No                | No                | No    | No    | No          | No     | No   | White        | No          | No          | -    | Doctor     | 1               | 469     | 278       | 780.64                | 19.90                 | 1.06            | 1.02                             |
| C     | 29895     | 29              | M   | 44  | 40-49 | Yes            | Yes            | No                | No                | Yes   | No    | Yes         | No     | No   | White        | 185         | 82          | 24.0 | Doctor     | 557             | 849     | 866       | 707.72                | 27.41                 | 1.10            | 1.60                             |
| C     | -         | 30              | -   | -   | -     | -              | -              | -                 | -                 | -     | -     | -           | -      | -    | -            | -           | -           | -    | -          | -               | -       | -         | 747.72                | 41.63                 | 1.13            | 1.49                             |
| C     | 29576     | 30              | F   | 34  | 30-39 | Yes            | Yes            | No                | No                | Yes   | No    | Yes         | No     | No   | White        | 163         | 64          | 24.1 | Nurse      | 471             | 585     | 234       | 790.88                | 52.87                 | 1.14            | 1.58                             |
| C     | 30640     | 32              | F   | 26  | 18-29 | Yes            | Yes            | No                | No                | Yes   | No    | Yes         | No     | No   | White        | 166         | 62          | 22.5 | Nurse      | 287             | 868     | 977       | 878.59                | 50.00                 | 1.11            | 0.95                             |
| C     | 29942*    | 32              | F   | 39  | 40-49 | No             | No             | No                | No                | Yes   | Yes   | Yes         | No     | No   | White        | 164         | 72          | 26.8 | Manager    | 319             | 398     | 325       | 744.72                | 81.67                 | 1.03            | 1.03                             |
| C     | 30732     | 32              | F   | 61  | >60   | No             | No             | No                | No                | No    | No    | Yes         | No     | No   | White        | No          | No          | -    | AHPs       | 393             | 840     | 301       | 537.83                | 56.96                 | 1.16            | 1.02                             |
| C     | 32015     | 41              | F   | 21  | 18-29 | No             | No             | No                | No                | No    | No    | No          | Yes    | No   | White        | 171         | 81          | 27.7 | -          | nd              | nd      | nd        | 861.36                | 35.48                 | 1.18            | 0.96                             |
| C     | 30338     | 44              | F   | 25  | 18-29 | No             | No             | No                | No                | No    | No    | Yes         | No     | No   | White        | No          | No          | -    | Nurse      | nd              | nd      | nd        | 402.1                 | 34.59                 | 1.12            | 0.93                             |

- = not reported; nd = not detected



**Supplementary Table 4: List of spike-binding salivary proteins identified by mass spectrometry**

| Protein name                                | Gene name | Abundance/Group |       |       |
|---------------------------------------------|-----------|-----------------|-------|-------|
|                                             |           | A               | B     | C     |
| Albumin                                     | ALB       | 1.82            | 3.60  | 2.13  |
| Amylase 1B                                  | AMY1B     | 31.91           | 37.05 | 37.42 |
| Azurocidin                                  | AZU1      | 0.07            | 0.05  | 0.10  |
| BPI fold-containing family A member 2       | BPIFA2    | 0.13            | 0.18  | 0.32  |
| BPI Fold Containing Family B Member 2       | BPIFB2    | 0.31            | 0.21  | 0.41  |
| Carbonic Anhydrase 6                        | CA6       | 0.09            | 0.06  | 0.05  |
| Cystatin SN                                 | CST1      | 0.95            | 0.66  | 1.26  |
| Cystatin C                                  | CST3      | 0.00            | 0.00  | 0.00  |
| Cystatin S                                  | CST4      | 0.03            | 0.03  | 0.00  |
| Cathepsin G                                 | CTSG      | 0.12            | 0.04  | 0.07  |
| Cytochrome C                                | CYCS      | 0.58            | 0.15  | 0.00  |
| Neutrophil defensin 1                       | DEFA1     | 0.49            | 1.46  | 2.23  |
| Deleted in malignant brain tumors 1 protein | DMBT1     | 0.38            | 0.36  | 0.02  |
| Ecm29 Proteasome Adaptor And Scaffold       | ECPAS     | 0.00            | 0.01  | 0.00  |
| Histone H2A type 1-B/E                      | H2AC4     | 0.21            | 0.04  | 0.00  |
| Hemoglobin subunit alpha                    | HBA1      | 0.02            | 0.06  | 0.02  |
| Hemoglobin subunit beta                     | HBB       | 0.25            | 0.47  | 0.30  |
| Immunoglobulin heavy constant alpha 1       | IGHA1     | 4.17            | 1.71  | 0.83  |
| Immunoglobulin heavy constant alpha 2       | IGHA2     | 0.23            | 0.14  | 0.08  |
| Immunoglobulin kappa constant               | IGKC      | 0.26            | 0.26  | 0.10  |
| Immunoglobulin lambda constant 7            | IGLC7     | 0.17            | 0.18  | 0.05  |
| Keratin_ type II cytoskeletal 1             | KRT1      | 1.26            | 0.77  | 0.57  |
| Keratin_ type I cytoskeletal 10             | KRT10     | 1.17            | 0.97  | 0.26  |
| Keratin_ type II cytoskeletal 2 epidermal   | KRT2      | 0.06            | 0.08  | 0.01  |
| Lactoperoxidase                             | LPO       | 0.67            | 0.89  | 0.66  |
| Lactotransferrin                            | LTF       | 1.78            | 0.53  | 1.42  |
| Lysozyme C                                  | LYZ       | 0.20            | 0.10  | 0.00  |
| Myoglobin                                   | MB        | 27.12           | 37.65 | 45.44 |
| Myeloperoxidase                             | MPO       | 0.55            | 0.17  | 0.51  |
| Polymeric immunoglobulin receptor           | PIGR      | 0.41            | 0.39  | 0.17  |
| Prolactin Induced Protein                   | PIP       | 0.96            | 0.91  | 0.89  |
| Serine Protease 1                           | PRSS1     | 0.12            | 0.14  | 0.00  |
| Protein S100-A9                             | S100A9    | 0.07            | 0.07  | 0.44  |
| Anti-thrombin III                           | SERPINC1  | 0.10            | 0.69  | 0.69  |
| Vimentin                                    | VIM       | 0.31            | 0.20  | 14.26 |
| Zymogen granule protein 16 homolog B        | ZG16B     | 16.58           | 4.91  | 1.95  |
